# Supplementary material for: Improving Mitochondrial Function in Skeletal Muscle Contributes to the Amelioration of Insulin Resistance by Nicotinamide Riboside
Source: MDPI journal article supplement (doi:10.3390/ijms241210015), 2023-06-12
Supplement: s1 [file s1]

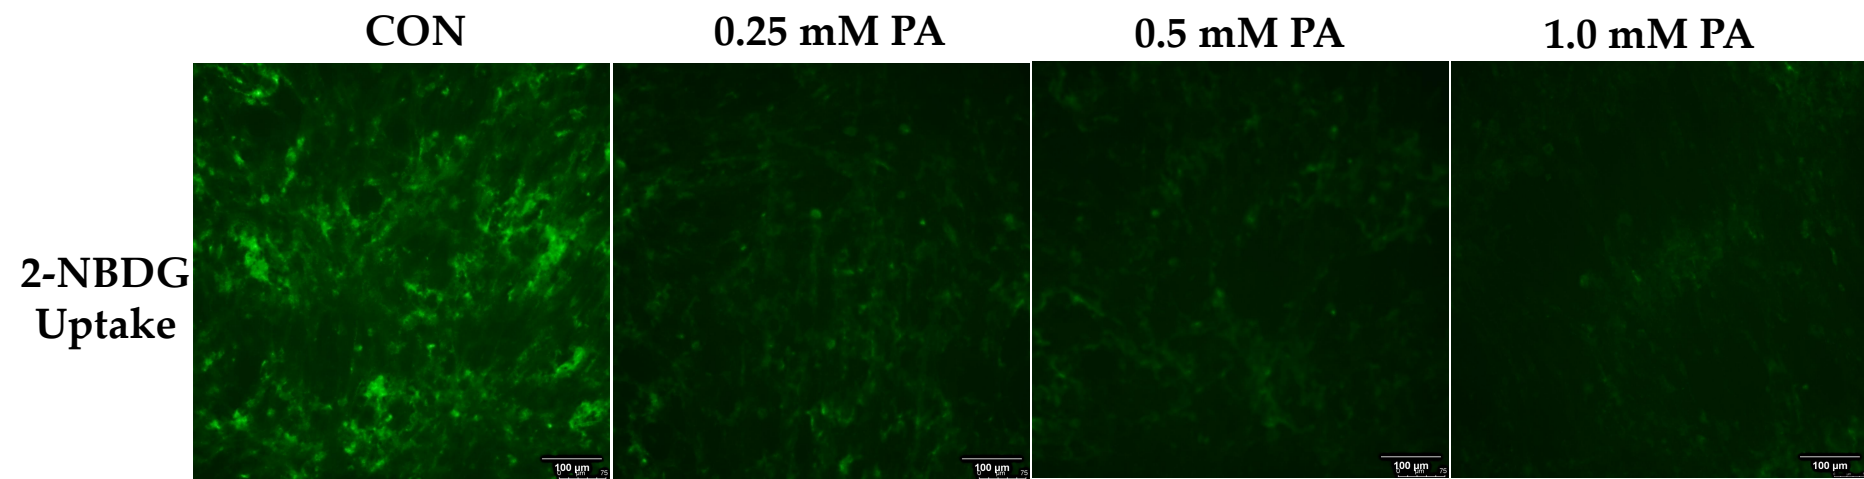

**Figure S1.** The dose-response experiments of PA in C2C12 myotube cells. Insulin stimulated uptake of 2-NBDG by C2C12 myotube cells treated with different dosages of PA for 24 h, the microscope magnification is 200×.
